# Supplementary material for: Oleuropein Induces AMPK-Dependent Autophagy in NAFLD Mice, Regardless of the Gender
Source: MDPI journal article supplement (doi:10.3390/ijms19123948), 2018-12-08
Supplement: s1 [file s1]

### Biochemical parameters of ND, ND+Ole, HFD and HFD+Ole Male mice

| Parameters        | ND            | ND+Ole        | HFD           | HFD+Ole       | <i>P</i> |
|-------------------|---------------|---------------|---------------|---------------|----------|
| Body Weight (gr)  | 39.91 ±0.94   | 37.05 ±0.71   | 55.12 ±3.71   | 50.05 ±1.63   | 0,0006   |
| Liver Weight (gr) | 2.02 ±0.06    | 1.37 ±0.09    | 3.47 ±0.39    | 2.24 ±0.117   | 0,001    |
| Heart Weight (gr) | 0.19 ±0.01    | 0.16 ±0.01    | 0.286 ±0.015  | 0.19 ±0.014   | 0,05     |
| ALT (U/L)         | 56.29 ±3.84   | 52.32 ±3.48   | 115.7 ±29.34  | 78.78 ±8.64   | 0,0004   |
| AST (U/L)         | 226.89 ±58.90 | 264.16 ±52.01 | 268.84 ±30.86 | 263.77 ±40.95 | 0,005    |
| CHOL (mg/dL)      | 155.13 ±10.95 | 148.91 ±9.75  | 192.79 ±23.74 | 160.16 ±12.93 | 0,001    |
| HDL (mg/dL)       | 92.30 ±4.75   | 89.7 ±4.46    | 130.13 ±8.372 | 104 ±3.11     | 0,001    |
| LDL (mg/dL)       | 9.36 ±0.84    | 9.07 ±0.88    | 14.43 ±2.18   | 12.48 ±1.3    | 0,014    |
| TRIG (mg/dL)      | 113.36 ±8.77  | 108.42 ±8.28  | 130.91 ±9.68  | 115.96 ±7.95  | 0,001    |

### Biochemical parameters of ND, ND+Ole, HFD and HFD+Ole Female mice

| Parameters        | ND            | ND+Ole        | HFD           | HFD+Ole       | <i>P</i> |
|-------------------|---------------|---------------|---------------|---------------|----------|
| Body Weight (gr)  | 36.53 ±1.352  | 30.16 ±1.31   | 47.45±2.04    | 44.2 ±2.28    | <0.0001  |
| Liver Weight (gr) | 1.96 ±0.13    | 1.72 ±0.17    | 2.96 ±0.23    | 1.92 ±0.14    | 0,0071   |
| Heart Weight (gr) | 0.16 ±0.003   | 0.15±0.0078   | 0.24 ±0.0026  | 0.15 ±0.0065  | 0,0066   |
| ALT (U/L)         | 52.26 ±24.15  | 50.05 ±16.64  | 76.05 ±27.92  | 56.16 ±4.53   | 0,0004   |
| AST (U/L)         | 261.01 ±62.55 | 198.83 ±58.52 | 265.62 ±25.25 | 261.04 ±75.62 | 0,005    |
| CHOL (mg/dL)      | 149.5 ±10.14  | 145.99 ±9.36  | 238.91 ±12.96 | 174.33 ±13.55 | 0,0001   |
| HDL (mg/dL)       | 82.16 ±4.86   | 90.40 ±4.34   | 126.52 ±4.14  | 94.38 ±5.13   | 0,0001   |
| LDL (mg/dL)       | 10.4 ±1.41    | 10.01 ±1.35   | 13.39 ±2.054  | 11.83 ±1.10   | 0,001    |
| TRIG (mg/dL)      | 72.40 ±6.70   | 84.6 ±6.78    | 117.78 ±11.20 | 102.18 ±13.36 | 0,0001   |

**Table S1.** Biochemical parameters of ND, ND+Ole, HFD and HFD+Ole Male (Top) and Female (Bottom) mice. Abbreviations: ALT, alanine aminotransferase; AST, aspartate aminotransferase; CHOL, Total cholesterol; HDL, High-Density Lipoprotein; LDL, Low-density lipoprotein; TRIG, triglycerides. Values are expressed as fold mean ±SD (\*P< 0.05; \*\*P< 0.01; \*\*\*P< 0.001).
